# Supplementary material for: The Complete Chloroplast Genome of Ye-Xing-Ba (Scrophularia dentata; Scrophulariaceae), an Alpine Tibetan Herb
Source: PLoS One. 2016 Jul 8;11(7):e0158488. doi: 10.1371/journal.pone.0158488 (PMC4938499; doi:10.1371/journal.pone.0158488)
Supplement: S2 Table — (XLS) [file pone.0158488.s002.xls]

## Sheet: protein coding genes
Percentages of variable sites in coding regions
Gene	Aligned length (bp)	No. of variable sites	Percentage of variable sites
psbA	1059	45	4.24929
matK	1536	257	16.7318
rps16	252	14	5.55556
psbK	186	25	13.4409
psbI	111	1	0.900901
atpA	1524	115	7.54593
atpF	558	46	8.24373
atpH	246	14	5.69106
atpI	744	49	6.58602
rps2	711	53	7.45429
rpoC2	4194	449	10.7058
rpoC1	2083	152	7.29717
rpoB	3214	216	6.7206
psbM	105	7	6.66667
psbD	1062	32	3.01318
psbC	1422	66	4.64135
psbZ	189	5	2.6455
rps14	303	14	4.62046
psaB	2205	129	5.85034
psaA	2253	114	5.05992
ycf3	510	21	4.11765
rps4	606	49	8.08581
ndhJ	477	35	7.33753
ndhK	678	53	7.81711
ndhC	363	22	6.06061
atpE	402	40	9.95025
atpB	1497	93	6.21242
rbcL	1434	100	6.9735
accD	1468	155	10.5586
psaI	111	7	6.30631
ycf4	555	43	7.74775
cema	693	66	9.52381
petA	963	69	7.16511
psbJ	123	6	4.87805
psbL	117	5	4.2735
psbF	120	7	5.83333
psbE	252	12	4.7619
petL	96	5	5.20833
petG	114	3	2.63158
psaJ	135	3	2.22222
rpl33	207	19	9.17874
rps18	306	20	6.53595
rpl20	390	38	9.74359
rps12	794	4	0.503778
clpP	588	59	10.034
psbB	1528	96	6.28272
psbT	111	8	7.20721
psbN	132	6	4.54545
psbH	222	15	6.75676
petB	648	25	3.85802
petD	527	45	8.5389
rpoA	1020	126	12.3529
rps11	417	33	7.91367
rpl36	114	8	7.01754
infA	234	18	7.69231
rps8	405	47	11.6049
rpl14	369	26	7.04607
rpl16	408	41	10.049
rps3	663	77	11.6139
rpl22	462	77	16.6667
rps19	279	37	13.2616
rpl2	828	7	0.845411
rpl23	282	2	0.70922
ycf2	6873	222	3.23003
ycf15	249	8	3.21285
ndhB	1533	20	1.30463
rps7	468	5	1.06838
ycf1	5622	1169	20.7933
ndhF	2261	368	16.276
rpl32	171	25	14.6199
ccsA	987	140	14.1844
ndhD	1503	161	10.7119
psaC	246	25	10.1626
ndhE	306	24	7.84314
ndhG	531	52	9.79284
ndhI	506	47	9.28854
ndhA	2206	298	13.5086
ndhH	1182	86	7.2758
rps15	273	39	14.2857

## Sheet: non-coding regions
Percentages of variable sites in non-coding regions
Region	Aligned length (bp)	No. of variable sites	Percentage of variable sites
trnH-GUG-psbA	510	153	30
psbA-trnKUUU	228	42	18.4211
trnK-UUU intron	2580	404	15.6589
trnK-UUU-rps16	954	115	12.0545
rps16 intron	947	169	17.8458
rps16-trnQ-UUG	1143	402	35.1706
trnQ-UUG-psbK	400	60	15
psbK-psbI	392	94	23.9796
psbI-trnS-GCU	124	29	23.3871
trnS-GCU-trnG-UCC	748	96	12.8342
trnG-UCC intron	688	63	9.15698
trnG-UCC-trnR-UCU	206	21	10.1942
trnR-UCU-atpA	112	16	14.2857
atpA-atpF	75	9	12
atpF intron	735	87	11.8367
atpF-atpH	433	58	13.3949
atpH-atpI	1071	220	20.5415
atpI-rps2	237	46	19.4093
rps2-rpoC2	215	58	26.9767
rpoC2-rpoC1	158	27	17.0886
rpoC1 intron	801	119	14.8564
rpoC1-rpoB	5	0	0
rpoB-trnC-GCA	1206	266	22.0564
trnC-GCA-petN	852	151	17.723
petN-psbM	1037	224	21.6008
psbM-trnD-GUC	539	142	26.3451
trnD-GUC-trnY-GUA	111	28	25.2252
trnY-GUA-trnE-UUC	71	4	5.6338
trnE-UUC-trnT-GGU	819	96	11.7216
trnT-GGU-psbD	1447	241	16.6551
psbC-trnS-UGA	248	38	15.3226
trnS-UGA-psbZ	347	42	12.1037
psbZ-trnG-GCC	292	77	26.3699
trnG-GCC-trnfM-CAU	184	39	21.1957
trnfM-CAU-rps14	152	18	11.8421
rps14-psaB	122	22	18.0328
psaB-psaA	25	1	4
psaA-ycf3	824	143	17.3544
ycf3 intron	1480	141	9.52703
ycf3-trnS-GGA	915	193	21.0929
trnS-GGA-rps4	319	77	24.1379
rps4-trnT-UGU	441	95	21.542
trnT-UGU-trnL-UAA	770	127	16.4935
trnL-UAA intron	496	61	12.2984
trnL-UAA-trnF-GAA	362	64	17.6796
trnF-GAA-ndhJ	737	212	28.7653
ndhJ-ndhK	118	38	32.2034
ndhK-ndhC	52	4	7.69231
ndhC-trnV-UAC	1116	341	30.5556
trnV-UAC intron	596	72	12.0805
trnV-UAC-trnM-CAU	190	29	15.2632
trnM-CAU-atpE	222	48	21.6216
atpB-rbcL	805	99	12.2981
rbcL-accD	729	105	14.4033
accD-psaI	737	209	28.3582
psaI-ycf4	461	75	16.269
ycf4-cemA	909	124	13.6414
cemA-petA	220	24	10.9091
petA-psbJ	1139	295	25.8999
psbJ-psbL	134	15	11.194
psbL-psbF	23	1	4.34783
psbF-psbE	14	0	0
psbE-petL	948	167	17.616
petL-petG	180	35	19.4444
petG-trnW-CCA	128	28	21.875
trnW-CCA-trnP-UGG	172	49	28.4884
trnP-UGG-psaJ	424	55	12.9717
psaJ-rpl33	514	83	16.1479
rpl33-rps18	173	30	17.341
rps18-rpl20	243	57	23.4568
rpl20-rps12	846	119	14.0662
rps12-clpP	155	19	12.2581
clpP intron	1473	228	15.4786
clpP-psbB	485	67	13.8144
psbB-psbT	172	50	29.0698
psbT-psbN	66	5	7.57576
psbN-psbH	105	6	5.71429
psbH-petB	126	25	19.8413
petB intron	742	75	10.1078
petB-petD	212	29	13.6792
petD intron	721	49	6.79612
petD-rpoA	191	32	16.7539
rpoA-rps11	77	14	18.1818
rps11-rpl36	109	15	13.7615
rpl36-infA	95	11	11.5789
infA-rps8	126	26	20.6349
rps8-rpl14	200	45	22.5
rpl14-rpl16	130	25	19.2308
rpl16 intron	904	102	11.2832
rpl16-rps3	160	32	20
rpl22-rps19	75	9	12
rps19-rpl2	65	7	10.7692
rpl2 intron	668	10	1.49701
rpl2-rpl23	18	1	5.55556
rpl23-trnI-CAU	165	6	3.63636
trnI-CAU-ycf2	88	2	2.27273
ycf2-ycf15	90	2	2.22222
ycf15-trnL-CAA	362	14	3.8674
trnL-CAA-ndhB	572	19	3.32168
ndhB intron	679	11	1.62003
ndhB-rps7	274	5	1.82482
rps7-rps12	53	0	0
rps12 intron	536	18	3.35821
rps12-trnV-GAC	1680	89	5.29762
trnV-GAC-rrn16	227	10	4.40529
rrn16-trnI-GAU	300	15	5
trnI-GAU intron	943	20	2.12089
trnI-GAU-trnA-UGC	70	1	1.42857
trnA-UGC intron	820	8	0.97561
trnA-UGC-rrn23	165	9	5.45455
rrn23-rrn45	101	2	1.9802
rrn45-rrn5	260	8	3.07692
rrn5-trnR-ACG	248	13	5.24194
trnR-ACG-trnN-GUU	580	37	6.37931
trnN-GUU-ycf1	329	13	3.95137
ndhF-rpl32	498	128	25.7028
rpl32-trnL-UAG	724	164	22.6519
trnL-UAG-ccsA	124	22	17.7419
ccsA-ndhD	253	100	39.5257
ndhD-psaC	127	15	11.811
psaC-ndhE	251	62	24.7012
ndhE-ndhG	220	69	31.3636
ndhG-ndhI	390	114	29.2308
ndhI-ndhA	89	26	29.2135
ndhA intron	1113	180	16.1725
ndhA-ndhH	1	0	0
ndhH-rps15	101	17	16.8317
rps15-ycf1	430	89	20.6977
